# Supplementary material for: Reduced Retinal Microvascular Density, Improved Forepaw Reach, Comparative Microarray and Gene Set Enrichment Analysis with c-jun Targeting DNA Enzyme
Source: PLOS journal article supplement (doi:10.1371/journal.pone.0039160), 2012-07-17
Supplement: S3 (10.1371/journal.pone.0039160.s003) [file journal.pone.0039160.s003]

**Supplementary Table 2. Summarized curated gene set terms with a Q-value (<0.05)**

**downregulated by Dz13.** Since names given to gene sets can be uninformative summarizing themes in collections of gene sets can be difficult. Here we used unique words in the names of each gene set and summarized the frequency of word occurrence. A complete list of all curated downregulated gene sets identified in GSEA is provided in the Supplementary Table 1.

| Term in Gene Set | Frequency |
|------------------|-----------|
| Cancer           | 46        |
| Luminal or Basal | 12        |
| Tumour/s         | 7         |
| Metastasis       | 5         |
| Carcinoma        | 4         |
| Myeloma          | 3         |
